# Supplementary material for: Stabilization and isolation of radical cation and dication salts of a tetrathiafulvalene derivative functionalized with amino groups
Source: Royal Society of Chemistry journal article supplement (doi:10.1039/d0nj04033a), 2020-01-01

## Electronic Supplementary Information

### **Stabilization and Isolation of Radical Cation and Dication of a Tetrathiafulvalene Derivative Functionalized with Amino Groups†**

Xiang Li, Yu-Han Liu, Guang-Zhou Zhu, and Feng Gao\*

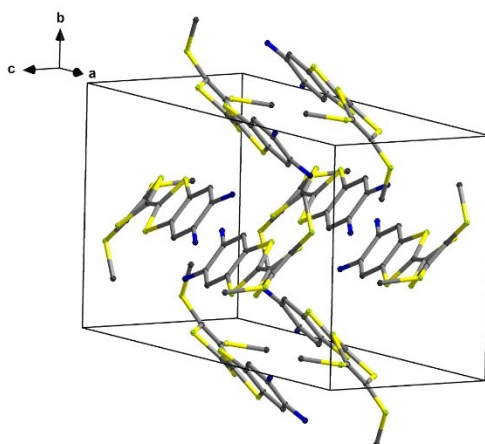

**Fig. S1** The extended structure of **1**. Hydrogen atoms have been omitted for clarity (C grey, N blue, and S yellow).

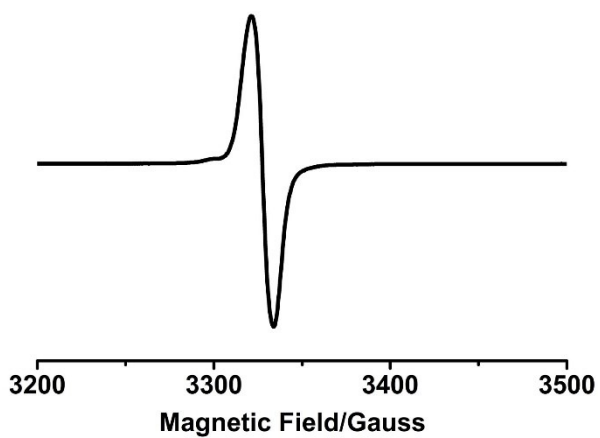

**Fig. S2** EPR spectra of  $1^{*+}$  in solid state at 77 K.

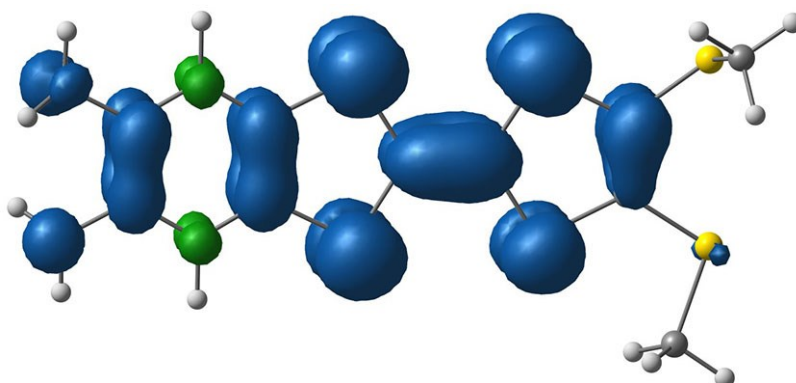

**Fig. S3** Spin density distribution of  $1^{*+}$ .

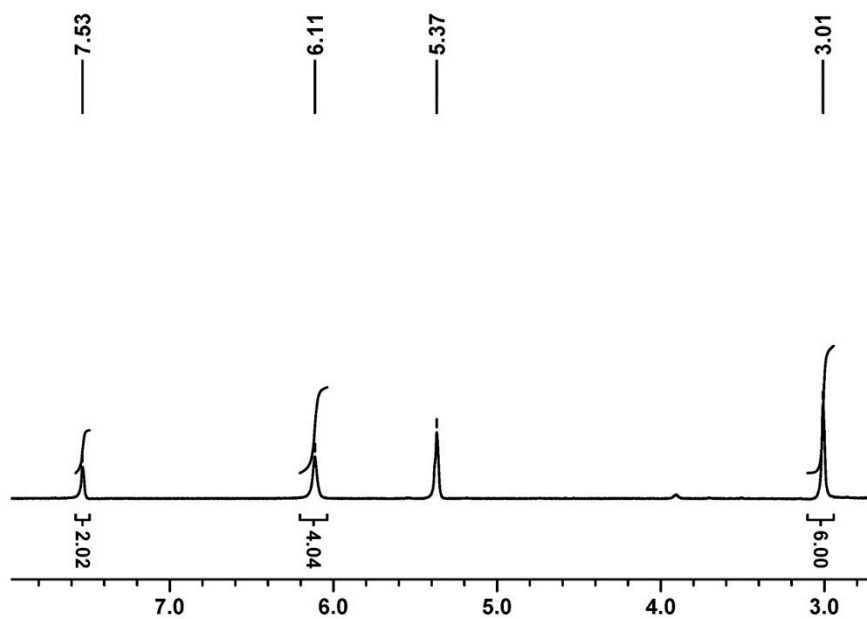

Fig. S4  $^1\text{H}$  NMR spectra of  $1^{2+}$  in  $\text{CD}_2\text{Cl}_2$ . Peaks around 5.37 ppm are ascribed to  $\text{CD}_2\text{Cl}_2$ .

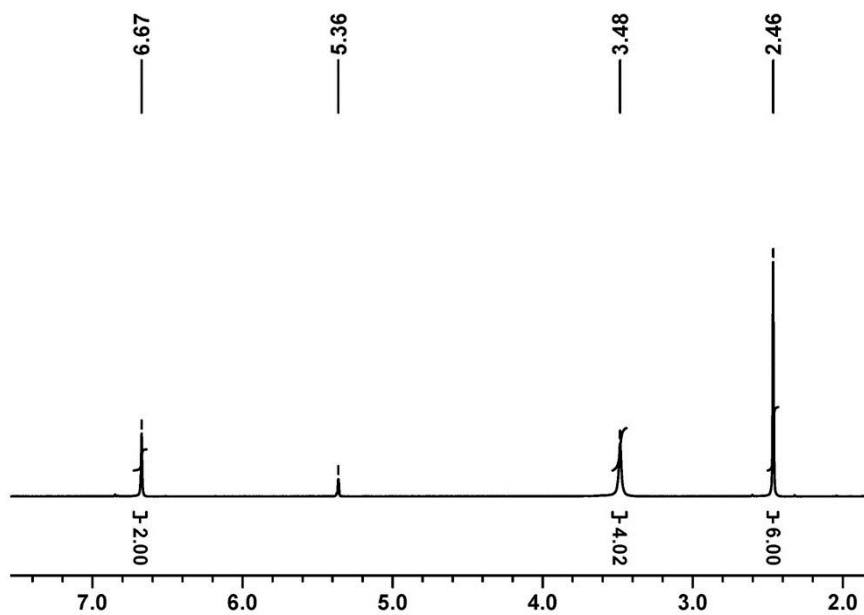

Fig. S5  $^1\text{H}$  NMR spectra of **1** in  $\text{CD}_2\text{Cl}_2$ . Peaks around 5.36 ppm are ascribed to  $\text{CD}_2\text{Cl}_2$ .

**Table S1. Selected Bond Lengths (Å) and Bond Angles (°) for 1, 1<sup>+</sup>, and 1<sup>2+</sup>.**

| <b>1</b>   |            | <b>1<sup>+</sup></b> |           | <b>1<sup>2+</sup></b> |           |
|------------|------------|----------------------|-----------|-----------------------|-----------|
| C7–C8      | 1.338(4)   | C6–C8                | 1.405(13) | C33–C36               | 1.415(6)  |
| C7–S1      | 1.747(3)   | C6–S1                | 1.715(11) | C33–S1                | 1.704(4)  |
| C7–S2      | 1.747(3)   | C6–S2                | 1.714(10) | C33–S2                | 1.697(4)  |
| S1–C5      | 1.751(3)   | S1–C15               | 1.723(14) | S1–C35                | 1.728(5)  |
| S2–C4      | 1.750(2)   | S2–C10               | 1.752(18) | S2–C34                | 1.727(5)  |
| C8–S3      | 1.754(3)   | C8–S3                | 1.688(9)  | C36–S3                | 1.697(4)  |
| C8–S4      | 1.751(3)   | C8–S4                | 1.722(10) | C36–S4                | 1.702(4)  |
| S3–C9      | 1.765(3)   | S3–C2                | 1.706(9)  | S3–C41                | 1.710(4)  |
| S4–C10     | 1.754(3)   | S4–C3                | 1.727(10) | S4–C42                | 1.719(5)  |
| C1–N1      | 1.395(3)   | C12–N1               | 1.423(14) | C38–N1                | 1.344(6)  |
| C2–N2      | 1.409(3)   | C11–N2               | 1.382(14) | C39–N2                | 1.350(6)  |
| S5–C11     | 1.792(5)   | S5–C27               | 1.770(3)  | S5–C43                | 1.822(10) |
| S6–C12     | 1.794(5)   | S6–C28               | 1.740(2)  | S6–C44                | 1.793(5)  |
| S1–C7–S2   | 115.71(14) | S1–C6–S2             | 115.9(6)  | S1–C33–S2             | 114.3(3)  |
| S3–C8–S4   | 113.29(14) | S3–C8–S4             | 117.3(6)  | S3–C36–S4             | 115.5(3)  |
| S1–C7–C8   | 122.6(2)   | S1–C6–C8             | 121.7(7)  | S1–C33–C36            | 123.1(3)  |
| S3–C8–C7   | 123.6(2)   | S4–C8–C6             | 120.1(7)  | S3–C36–C33            | 122.0(3)  |
| C9–S5–C11  | 102.64(18) | C10–S5–C27           | 103.1(12) | C34–S5–C43            | 99.8(4)   |
| C10–S6–C12 | 101.44(16) | C15–S6–C28           | 101.1(8)  | C35–S6–C44            | 102.8(2)  |
| N1–C1–C2   | 118.1(2)   | N1–C12–C11           | 122.2(13) | N1–C38–C39            | 119.1(5)  |
| N2–C2–C1   | 118.2(2)   | N2–C11–C12           | 121.6(11) | N2–C39–C38            | 118.2(4)  |

**Table S2. Selected Experimental and Calculated Structural Parameters for 1, 1<sup>•+</sup>, and 1<sup>2+</sup>.**

|                                    | <b>1</b>        | <b>1<sup>•+</sup></b> | <b>1<sup>2+</sup></b> |
|------------------------------------|-----------------|-----------------------|-----------------------|
| Central C=C bond for TTF core (Å)  | 1.338(4) (exp.) | 1.405(13) (exp.)      | 1.415(6) (exp.)       |
|                                    | 1.352 (cal.)    | 1.388 (cal.)          | 1.410 (cal.)          |
| Average N-C bonds (Å)              | 1.402 (exp.)    | 1.403 (exp.)          | 1.347 (exp.)          |
|                                    | 1.410 (cal.)    | 1.386 (cal.)          | 1.361 (cal.)          |
| Average S-C bonds for TTF core (Å) | 1.752 (exp.)    | 1.718 (exp.)          | 1.710 (exp.)          |
|                                    | 1.781 (cal.)    | 1.755 (cal.)          | 1.737 (cal.)          |
| Average ∠C-S-C for TTF core (°)    | 94.77 (exp.)    | 95.38 (exp.)          | 97.15 (exp.)          |
|                                    | 94.55 (cal.)    | 96.37 (cal.)          | 97.28 (cal.)          |

**Table S3. Selected Experimental and Calculated Optical Transitions for 1, 1<sup>•+</sup>, and 1<sup>2+</sup>.**

|                       | Orbital Excitation  | Major Contribs | Osc. Strength | λ / nm (exp.) | λ / nm (cal.) |
|-----------------------|---------------------|----------------|---------------|---------------|---------------|
| <b>1</b>              | HOMO-1→LUMO         | 50%            | 0.2833        | 315, 335      | 319           |
|                       | HOMO→LUMO+2         | 39%            |               |               |               |
|                       | HOMO (β)→LUMO (β)   | 99%            | 0.3423        | 1025          | 1029          |
| <b>1<sup>•+</sup></b> | HOMO (α)→LUMO+2 (α) | 25%            | 0.2054        | 445, 401      | 389           |
|                       | HOMO-4 (β)→LUMO (β) | 61%            |               |               |               |
| <b>1<sup>2+</sup></b> | HOMO→LUMO           | 106%           | 0.8455        | 885           | 876           |
|                       | HOMO-3→LUMO         | 99%            | 0.0115        | 453           | 448           |

**Table S4. Mulliken Spin Densities for the Optimized Geometry of 1<sup>+</sup>.**

---

|    |   |           |           |
|----|---|-----------|-----------|
| 1  | C | -0.115972 | 0.053198  |
| 2  | C | -0.116223 | 0.053546  |
| 3  | C | -0.206850 | -0.035365 |
| 4  | H | 0.169792  | 0.001014  |
| 5  | C | -0.206675 | -0.035217 |
| 6  | H | 0.168628  | 0.001012  |
| 7  | C | -0.341350 | 0.110559  |
| 8  | C | -0.294808 | 0.067033  |
| 9  | C | -0.323247 | 0.061265  |
| 10 | C | 0.317900  | 0.051600  |
| 11 | C | 0.318314  | 0.051691  |
| 12 | C | -0.247656 | 0.007636  |
| 13 | C | -0.597216 | 0.005551  |
| 14 | H | 0.216464  | 0.000143  |
| 15 | H | 0.202122  | -0.000377 |
| 16 | C | -0.647260 | -0.000327 |
| 17 | H | 0.215312  | 0.000440  |
| 18 | H | 0.217156  | 0.000328  |
| 19 | H | 0.229877  | -0.000104 |
| 20 | N | -0.802338 | 0.034100  |
| 21 | H | 0.351352  | -0.001211 |
| 22 | H | 0.354759  | 0.000930  |
| 23 | N | -0.802336 | 0.033925  |
| 24 | H | 0.350908  | -0.001200 |
| 25 | H | 0.354858  | 0.000931  |
| 26 | S | 0.381850  | 0.099399  |
| 27 | S | 0.412128  | 0.154832  |
| 28 | S | 0.362810  | 0.134690  |
| 29 | S | 0.369095  | 0.134281  |
| 30 | S | 0.206947  | -0.003733 |
| 31 | S | 0.291856  | 0.019684  |
| 32 | H | 0.209803  | -0.000253 |

---

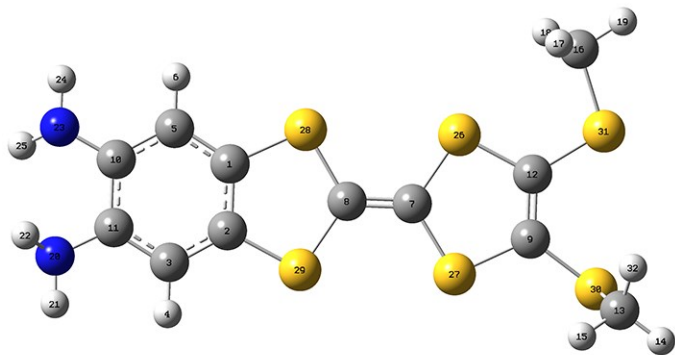

Supplement: d0nj04033a1.pdf [file d0nj04033a1.pdf]
